# Supplementary material
Source: Springer Nature journal article supplement (https://www.springermedizin.de/resource/supplementary/13054_2012_1866_MOESM3_ESM.pdf/9711690)

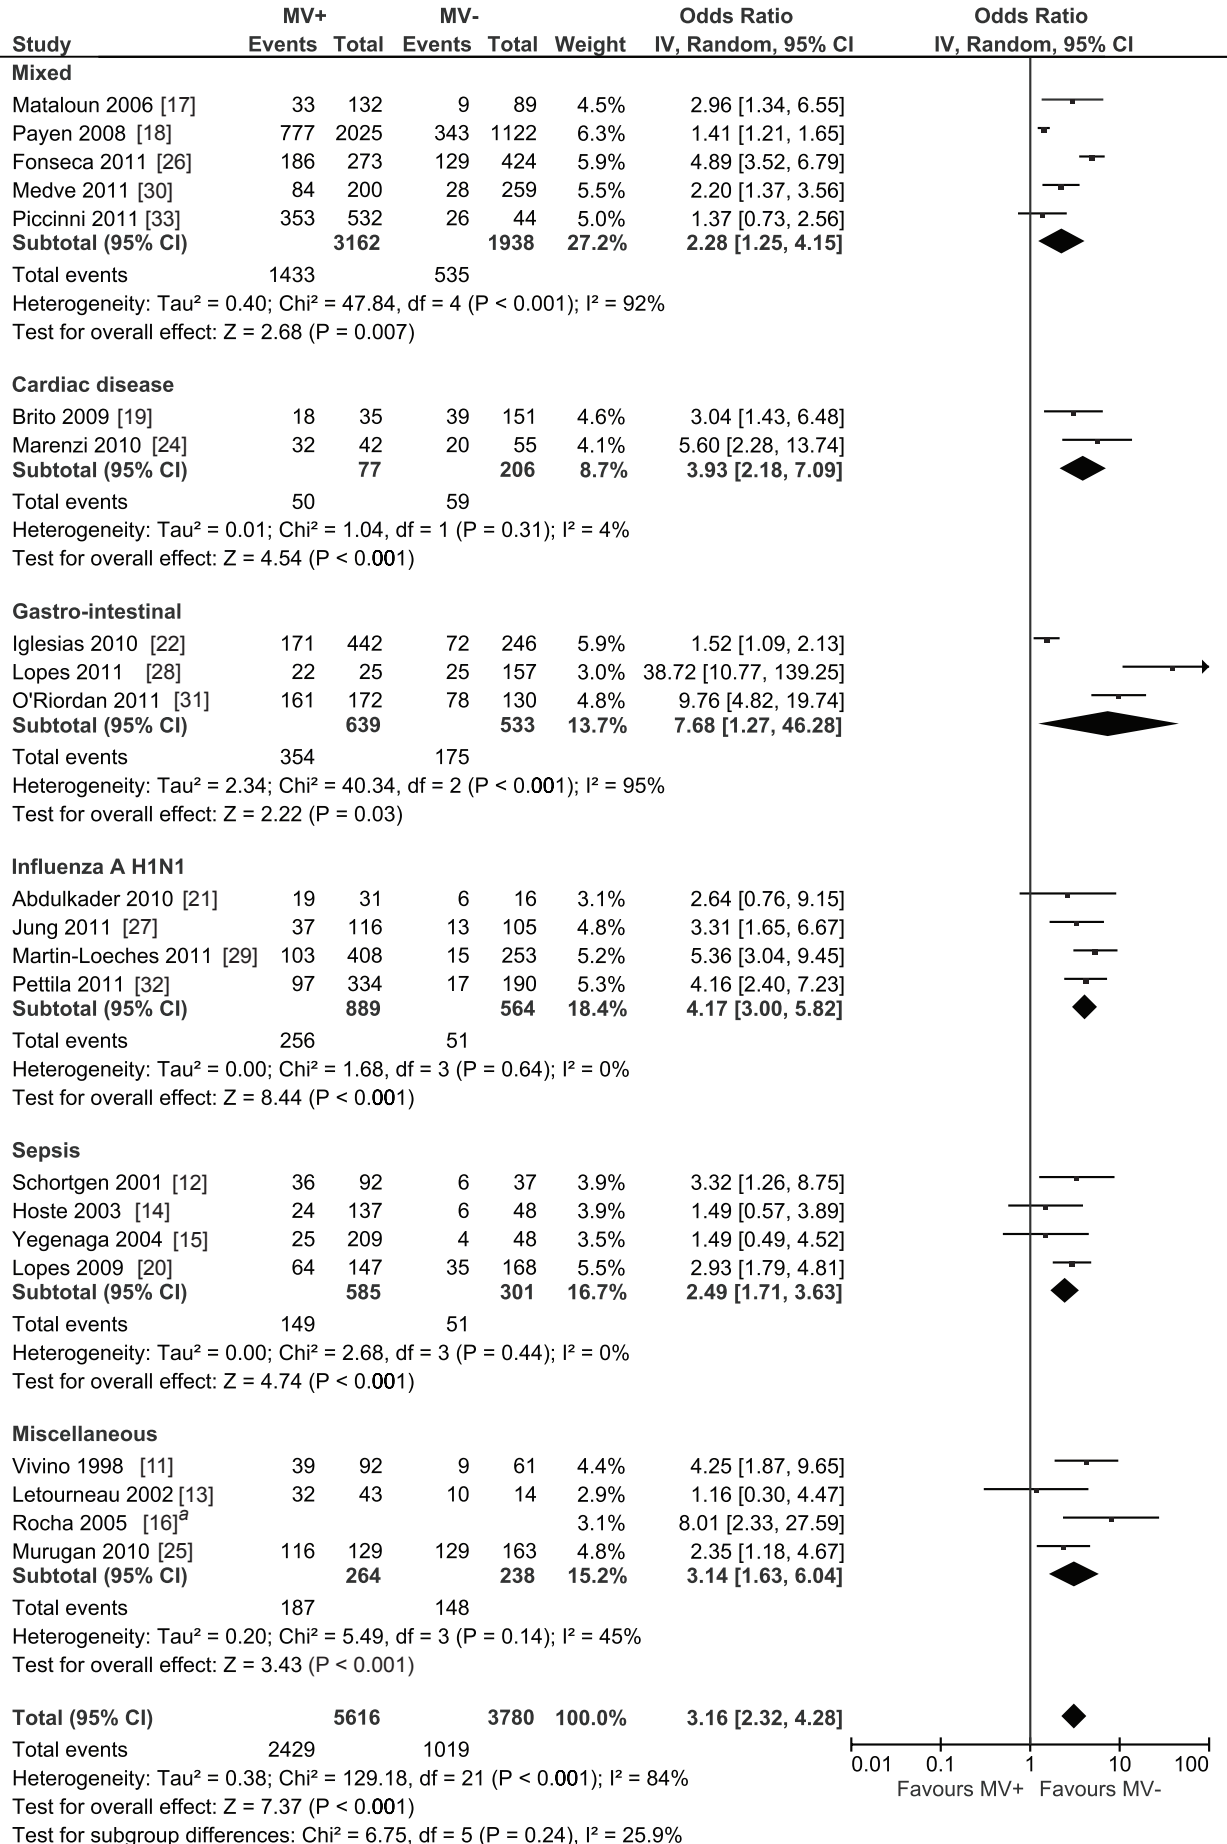

Supplement: MOESM3 [file 9711690]
